# Supplementary material for: Evaluation of the Links between Lamb Feed Efficiency and Rumen and Plasma Metabolomic Data
Source: MDPI journal article supplement (doi:10.3390/metabo12040304), 2022-03-29
Supplement: s1 [file s1]

**Table S1.** Metabolites identified and quantified in the four biological fluid × diet combinations. For each metabolite, the number of samples in which it has been identified is expressed followed by the prevalence percentage between parentheses.

|                                                                         |                         | Plasma          |                | Rumen           |                |
|-------------------------------------------------------------------------|-------------------------|-----------------|----------------|-----------------|----------------|
|                                                                         |                         | CONC<br>(n=274) | MIX<br>(n=166) | CONC<br>(n=273) | MIX<br>(n=164) |
| Number of samples in which the metabolite was identified (prevalence %) |                         |                 |                |                 |                |
| <b>Organic acids</b>                                                    |                         |                 |                |                 |                |
|                                                                         | Acetate                 | 274 (100)       | 166 (100)      | 273 (100)       | 164 (100)      |
|                                                                         | Azelaate                |                 |                | 273 (100)       |                |
|                                                                         | Butyrate                |                 |                | 273 (100)       | 164 (100)      |
|                                                                         | Citrate                 | 274 (100)       | 166 (100)      |                 |                |
|                                                                         | Citraconate             |                 |                | 232 (85.0)      | 76 (46.3)      |
|                                                                         | Ethylmalonate           |                 |                | 273 (100)       | 164 (100)      |
|                                                                         | Gluconate               |                 | 166 (100)      |                 |                |
|                                                                         | Beta-hydroxyisovalerate | 274 (100)       |                | 273 (100)       |                |
|                                                                         | 3-hydroxybutyrate       | 274 (100)       | 166 (100)      |                 |                |
|                                                                         | 4-hydroxyphenylacetate  |                 |                | 272 (100)       |                |
|                                                                         | Isobutyrate             |                 |                | 273 (100)       | 164 (100)      |
|                                                                         | Isovalerate             |                 |                |                 | 164 (100)      |
|                                                                         | Lactate                 | 274 (100)       | 166 (100)      | 253 (92.7)      |                |
|                                                                         | Malate                  | 274 (100)       |                | 271 (99.3)      |                |
|                                                                         | 2-oxobutyrate           |                 |                | 253 (92.6)      |                |
|                                                                         | 2-oxoglutarate          |                 |                | 272 (99.6)      |                |
|                                                                         | 2-oxoisovalerate        | 274 (100)       |                |                 |                |
|                                                                         | Pantothenate            | 274 (100)       |                |                 |                |
|                                                                         | 3-phenylpropionate      |                 |                | 273 (100)       | 164 (100)      |
|                                                                         | Propionate              |                 |                | 273 (100)       | 164 (100)      |
|                                                                         | Pyroglutamate           |                 |                | 269 (98.5)      |                |
|                                                                         | Pyruvate                | 264 (96.3)      |                |                 |                |
|                                                                         | Sebacate                |                 |                |                 | 164 (100)      |
|                                                                         | Succinate               |                 |                | 248 (90.8)      | 164 (100)      |
|                                                                         | Valerate                |                 |                | 273 (100)       | 164 (100)      |
| <b>Amino acids</b>                                                      |                         |                 |                |                 |                |
|                                                                         | N-acetylaspartate       |                 |                | 273 (100)       | 164 (100)      |
|                                                                         | Alanine                 |                 |                | 273 (100)       | 164 (100)      |

|                          |                  |            |            |            |           |
|--------------------------|------------------|------------|------------|------------|-----------|
|                          | 2-aminobutyrate  |            |            | 273 (100)  |           |
|                          | Aspartate        |            |            | 273 (100)  |           |
|                          | N-Acetylglycine  | 274 (100)  | 166 (100)  | 267 (97.8) |           |
|                          | Betaine          | 273 (99.6) | 166 (100)  |            |           |
|                          | Citrulline       | 274 (100)  |            |            |           |
|                          | Creatine         | 274 (100)  | 166 (100)  |            |           |
|                          | Cystine          | 274 (100)  | 166 (100)  | 273 (100)  |           |
|                          | GABA             |            |            | 273 (100)  |           |
|                          | Glutamate        | 274 (100)  |            | 273 (100)  |           |
|                          | Glutamine        | 274 (100)  |            |            |           |
|                          | Glycine          | 274 (100)  | 166 (100)  | 273 (100)  | 164 (100) |
|                          | Isoleucine       |            |            | 273 (100)  |           |
|                          | Leucine          | 274 (100)  | 166 (100)  | 268 (98.1) | 164 (100) |
|                          | Methionine       |            |            | 272 (99.6) |           |
|                          | 3-methylxanthine |            |            | 273 (100)  | 164 (100) |
|                          | Phenylalanine    | 274 (100)  |            | 273 (100)  |           |
|                          | Proline          |            |            | 273 (100)  |           |
|                          | Serine           | 274 (100)  | 166 (100)  |            |           |
|                          | Taurine          | 274 (100)  |            |            |           |
|                          | Threonine        | 274 (100)  | 165 (99.4) | 273 (100)  | 164 (100) |
|                          | Tyrosine         |            |            | 273 (100)  |           |
|                          | Valine           | 274 (100)  | 166 (100)  |            |           |
| <b>Alcohols</b>          |                  |            |            |            |           |
|                          | Choline chloride | 265 (96.7) | 161 (97.0) | 273 (100)  |           |
|                          | Ethanolamine     | 265 (96.7) | 166 (100)  |            |           |
|                          | 4-Ethylphenol    |            |            | 273 (100)  |           |
|                          | Glycerol         | 274 (100)  | 166 (100)  |            |           |
|                          | Methanol         | 274 (100)  | 166 (100)  | 187 (68.5) |           |
|                          | Myo-inositol     | 274 (100)  |            |            |           |
|                          | Phosphocholine   | 271 (98.9) | 166 (100)  |            |           |
| <b>Other metabolites</b> |                  |            |            |            |           |
|                          | Cadaverine       |            |            | 269 (98.5) | 164 (100) |
|                          | Carnitine        | 274 (100)  | 166 (100)  |            |           |
|                          | Creatinine       | 274 (100)  | 166 (100)  |            |           |
|                          | Dimethylsulfone  | 274 (100)  | 166 (100)  | 273 (100)  | 164 (100) |

|  |              |            |           |            |  |
|--|--------------|------------|-----------|------------|--|
|  | Glucose      | 274 (100)  | 166 (100) | 272 (99.6) |  |
|  | Levogluconan |            |           | 273 (100)  |  |
|  | TMAO         | 259 (94.5) |           |            |  |
|  | Uracil       | 274 (100)  |           | 273 (100)  |  |

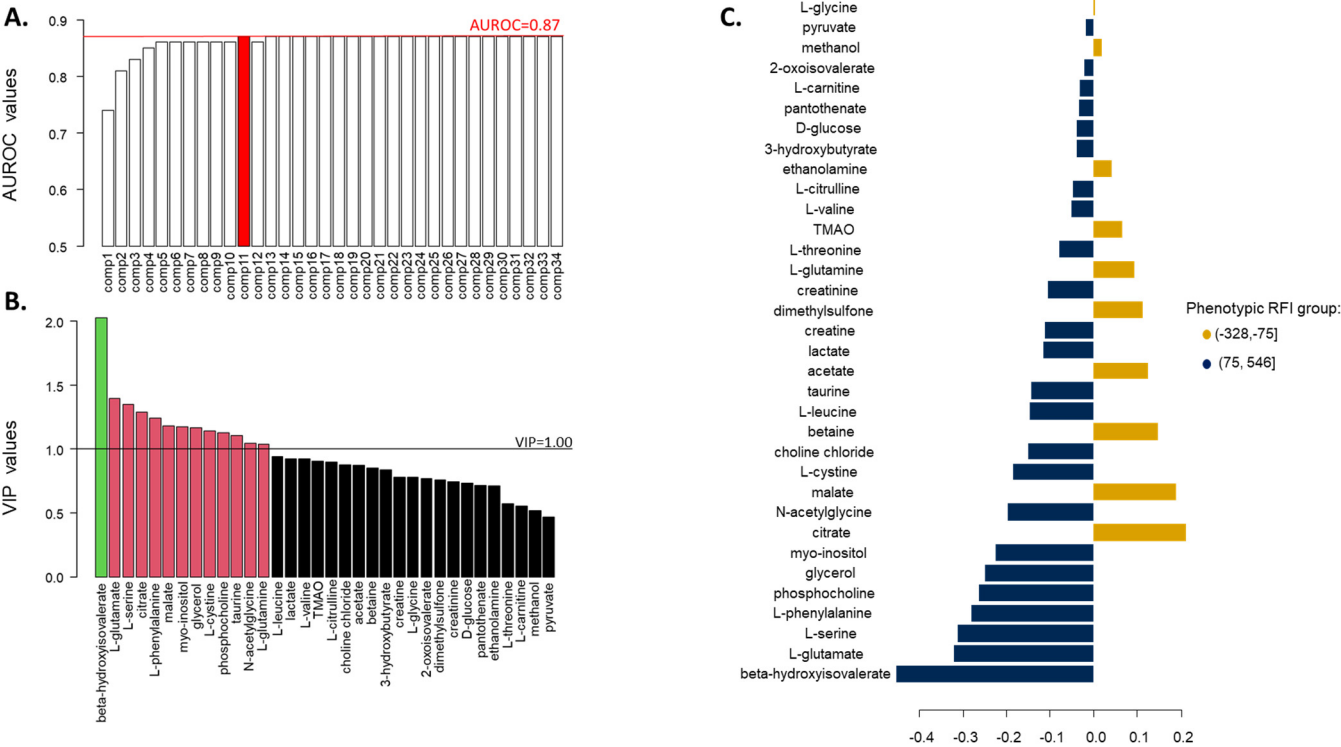

**Figure S1.** Discriminant analysis of the plasma metabolites measured during the CONC phase according to phenotypic RFI groups. Efficient animals are the ones that had a phenotypic RFI between -328 and -75 g/day and inefficient animals are the ones that had a phenotypic RFI between 75 and 546 g/day. (A) Accuracy of the PLS-DA models assessed using AUROC; red line marks the maximum AUROC value obtained with 11 components. (B) Selection of the variables contributing the most to the discriminant analysis using a VIP approach. (C) Loading values assigned to each metabolite on the first component of the PLS-DA model; gold and blue represent metabolites associated with efficient and inefficient animals, respectively.
